# Supplementary material
Source: PubMed Central journal article supplement (PMC2900702)
Supplement: 1001948107_pnas.201001948SI.pdf [file 1001948107_pnas.201001948SI.pdf]

# Supporting Information

Vargas et al. 10.1073/pnas.1001948107

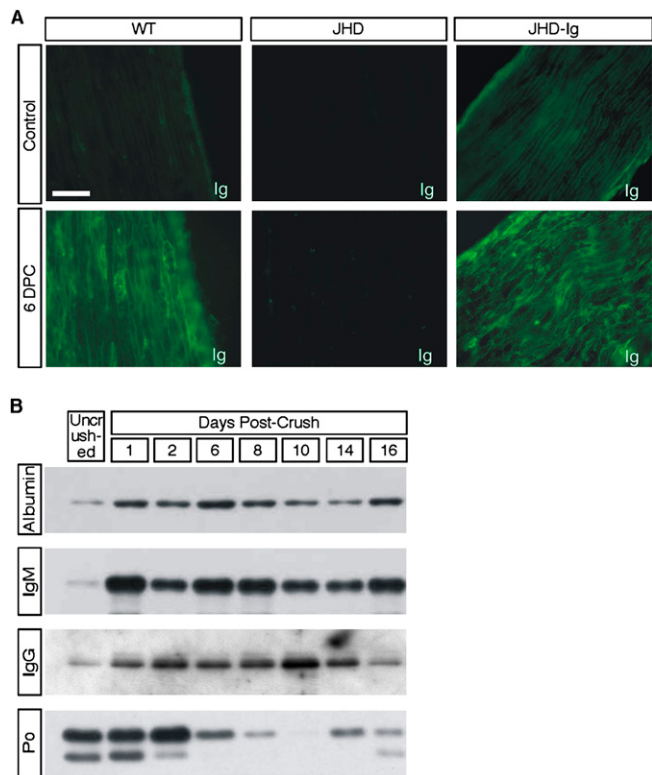

**Fig. S1.** Antibodies accumulate in the sciatic nerve after crush. (A) Immunostaining of uncrushed sciatic nerves and nerves 6 d after crush using anti-mouse IgG antibody (green) in WT, JHD, and JHD mice following passive transfer of IgG purified from naïve WT mice. (B) Western blot of IgM, IgG, albumin, and P<sub>0</sub> levels following sciatic nerve injury (3 µg of protein per lane). (Scale bar, 200 µm.)

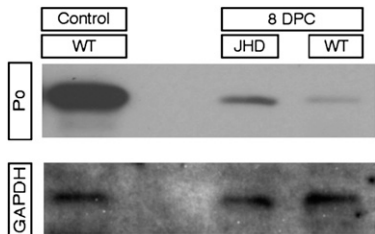

**Fig. S2.** C57BL/6 JHD mice also display delayed clearance of P<sub>0</sub> in the sciatic nerve after injury, phenocopying the delay observed in BALB/c JHD mice. Western blot of WT and JHD mouse sciatic nerve lysates 8 d following sciatic nerve crush, probed with anti-P<sub>0</sub> and anti-GAPDH (loading control) antibodies (1 µg of protein per lane).

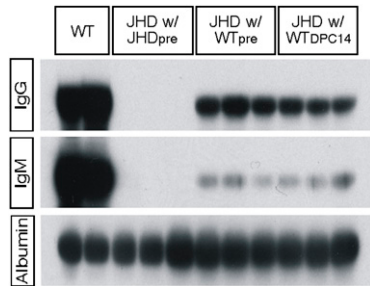

**Fig. S3.** JHD mice 8 d after passive transfer have detectable levels of Ig in their sera. Western blot of sera of JHD mice following i.p. injection of whole serum from WT mice. Each lane represents serum from a unique animal.

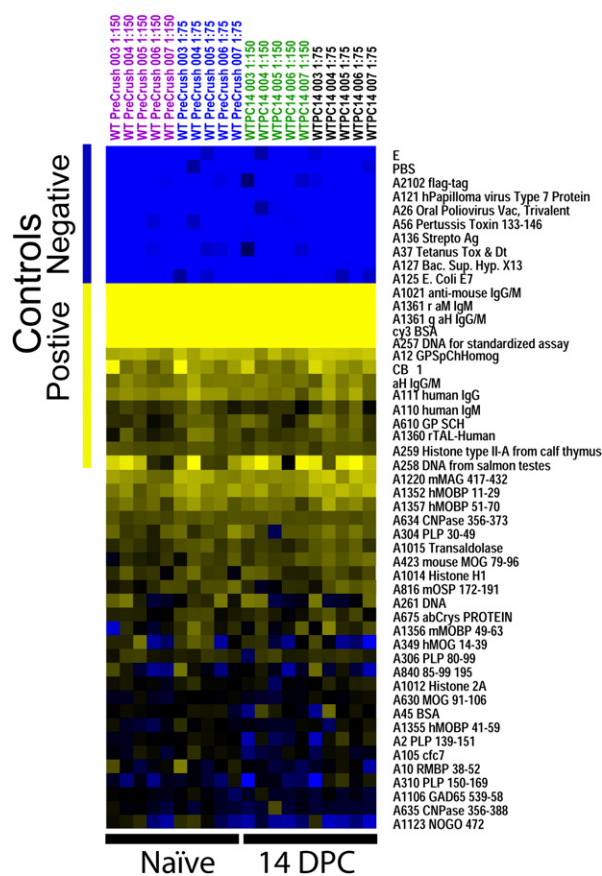

**Fig. S4.** Endogenous antibodies from WT mice demonstrate binding to several myelin antigens. Serum samples before and after sciatic nerve crush from five WT mice were used to probe a myelin antigen array containing over 500 myelin peptides. Only top 26 hits are shown. Data are presented as heat map, with 4% of total antigens showing positive binding. No statistical difference was found between naïve and postcrush samples.

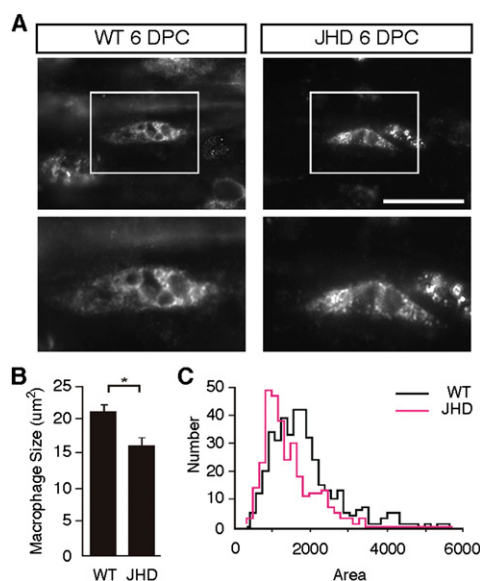

**Fig. S5.** JHD mice demonstrate morphological differences consistent with decreased phagocytosis. (A) Higher magnification images of WT and JHD macrophages immunostained with the macrophage-specific markers CD68 and F4/80 antibodies. JHD macrophages exhibit decreased foam cell morphology 6 d after crush. (Scale bar, 25  $\mu$ m.) (B) Average measurements of macrophage cell area were taken by using ImageJ software. (\* $P < 0.05$ ) (C) Histogram showing the distribution of macrophage cell area in WT and JHD nerves at 6 d postcrush. ( $n = 7$  mice per genotype; 408 macrophages from WT and 307 macrophages from JHD animals were measured).

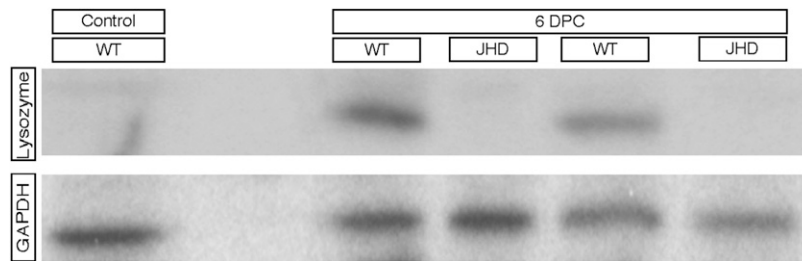

**Fig. S6.** JHD mice fail to upregulate lysozyme in sciatic nerve 6 d after injury. Western blot of WT and JHD mouse sciatic nerve lysates 6 d following sciatic nerve crush, probed with anti-lysozyme and anti-GAPDH (loading control) antibodies (4  $\mu$ g of protein per lane).
